# Supplementary material for: The morphology controlled growth of Co11(HPO3)8(OH)6 on nickel foams for quasi-solid-state supercapacitor applications
Source: Royal Society of Chemistry journal article supplement (doi:10.1039/d0ce00885k), 2020-01-01
Supplement: d0ce00885k1.pdf [file d0ce00885k1.pdf]

## Supporting Information

### **Morphology-controlled growth of $\text{Co}_{11}(\text{HPO}_3)_8(\text{OH})_6$ on nickel foam for quasi-solid-state supercapacitor applications**

Yamei Tian<sup>a</sup>, Xiaojuan Lian<sup>a</sup>, Yueli Wu<sup>a</sup>, Wei Guo<sup>b,\*\*</sup>, Shuang Wang<sup>a,\*</sup>

a. College of Environmental Science and Engineering, Taiyuan University of Technology, Jinzhong 030600, PR China;

b. Institute of Energy Innovation, College of Materials Science and Engineering, Taiyuan University of Technology, Taiyuan, 030024, PR China.

\*Corresponding author.

E-mail: wangshuang@tyut.edu.cn.

\*\*Corresponding author.

E-mail: guowei1982cry@163.com.

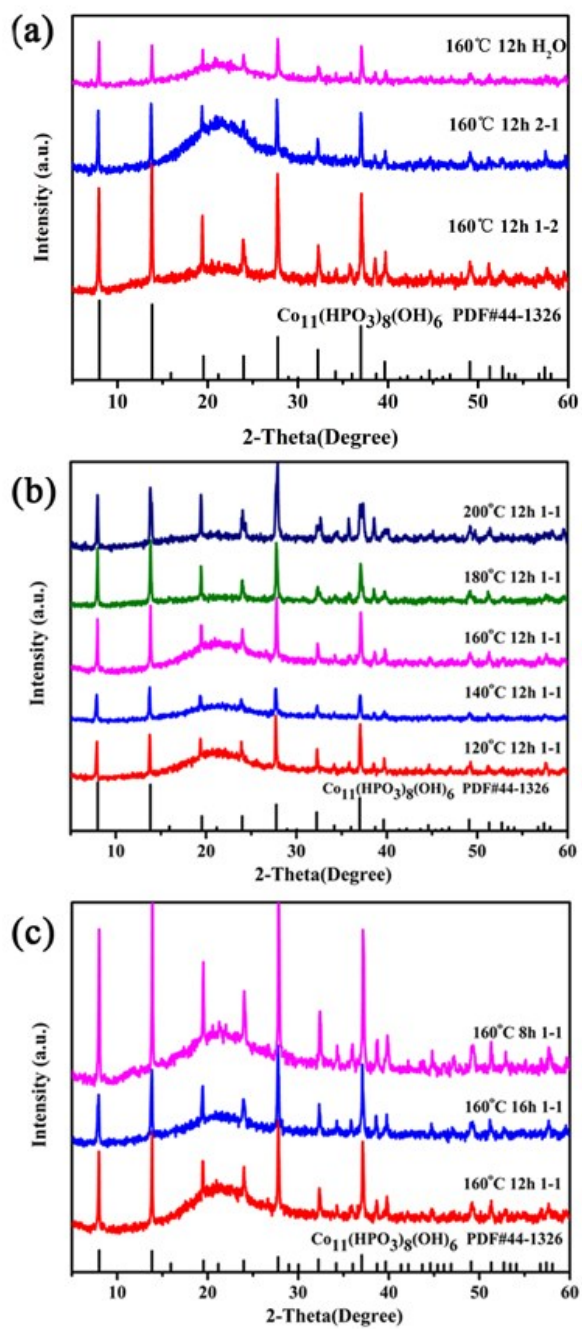

**Figure S1** XRD patterns at different (a) solvents; (b) temperatures; (c) times.

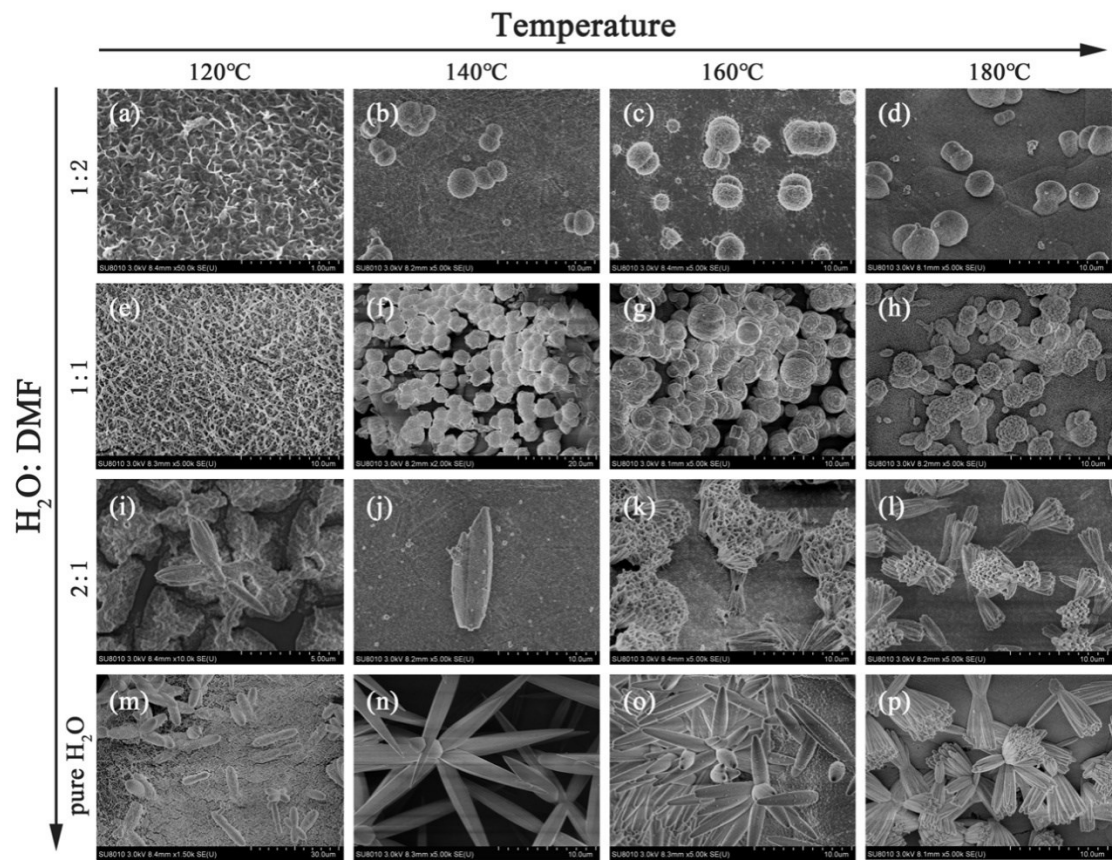

**Figure S2** The SEM of  $\text{Co}_{11}(\text{HPO}_3)_8(\text{OH})_6$  at different solvents ratios and temperatures.

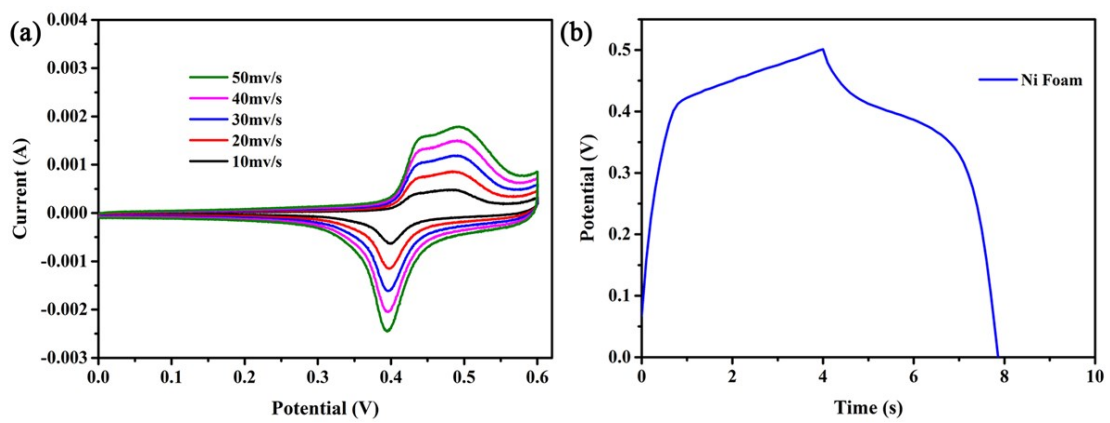

**Figure S3** The CV curves at 10-50 mV and GCD curves at 1 A/g of Ni foam.

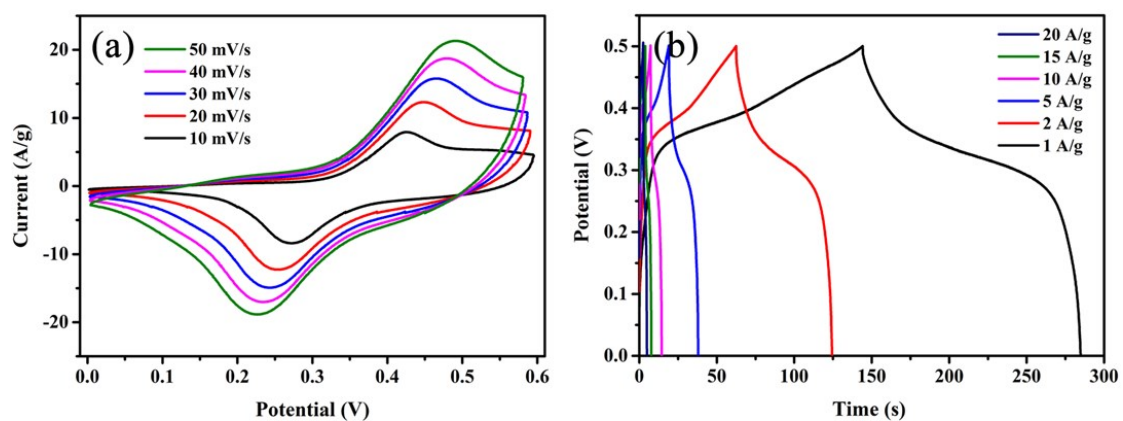

**Figure S4** The CV curves at at different scan rates and GCD curves at various current densities of 160 °C 12 h H<sub>2</sub>O.

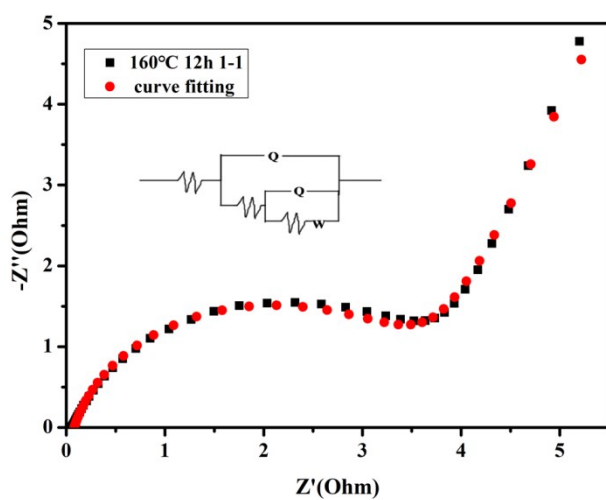

**Figure S5** The Nyquist plots and equivalent circuits of Co<sub>11</sub>(HPO<sub>3</sub>)<sub>8</sub>(OH)<sub>6</sub>.

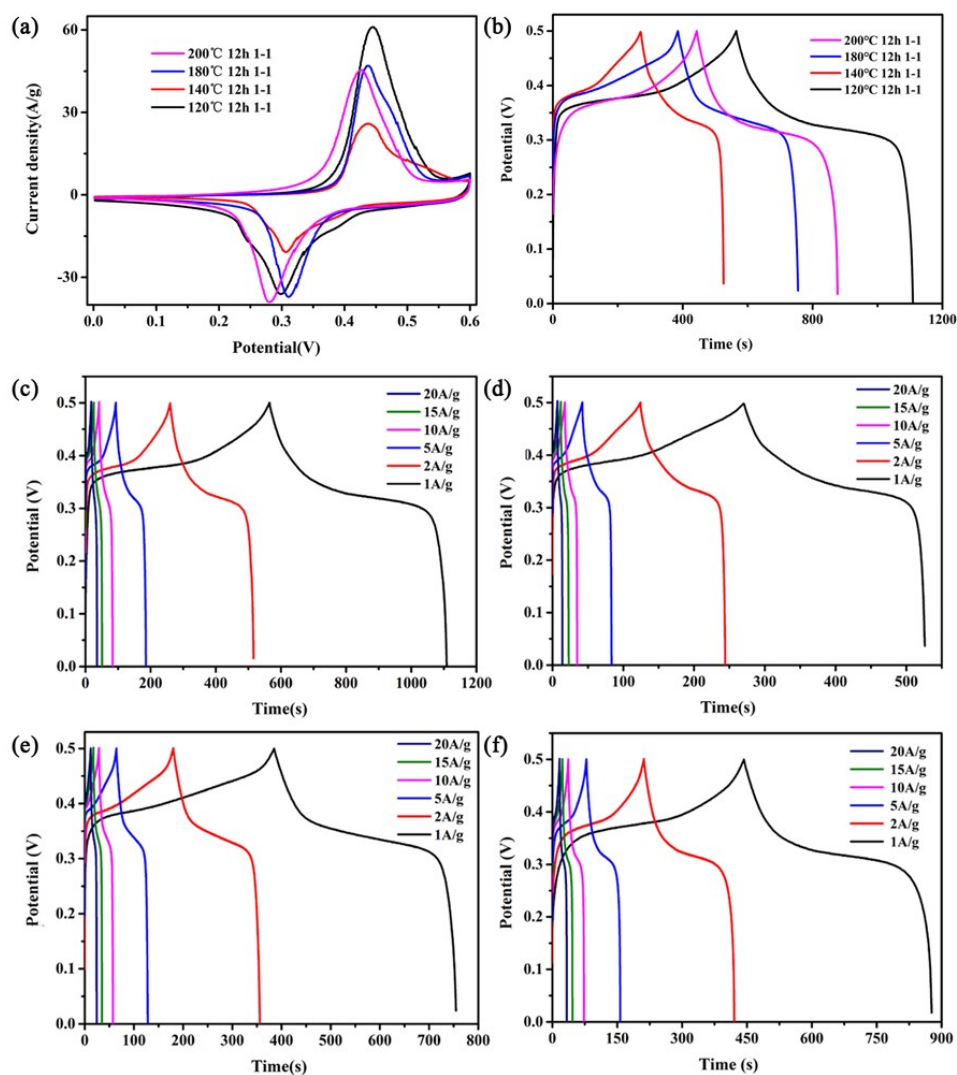

**Figure S6** (a) The CV curves at different temperatures; (b) The GCD curves at different temperatures; The GCD curves at various current densities of (c) 120 °C 12 h 1-1; (d) 140 °C 12 h 1-1; (e) 180 °C 12 h 1-1; (f) 200 °C 12 h 1-1.

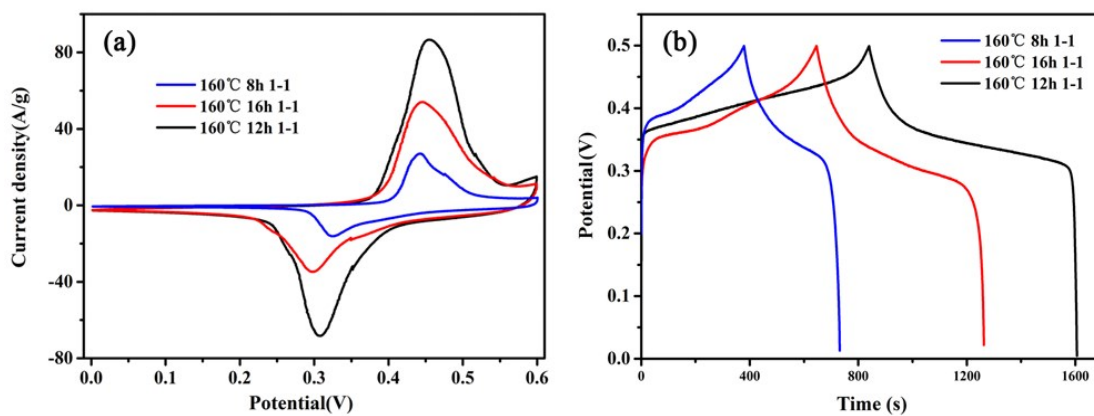

**Figure S7** (a) The CV curves; (b) The GCD curves at different times.

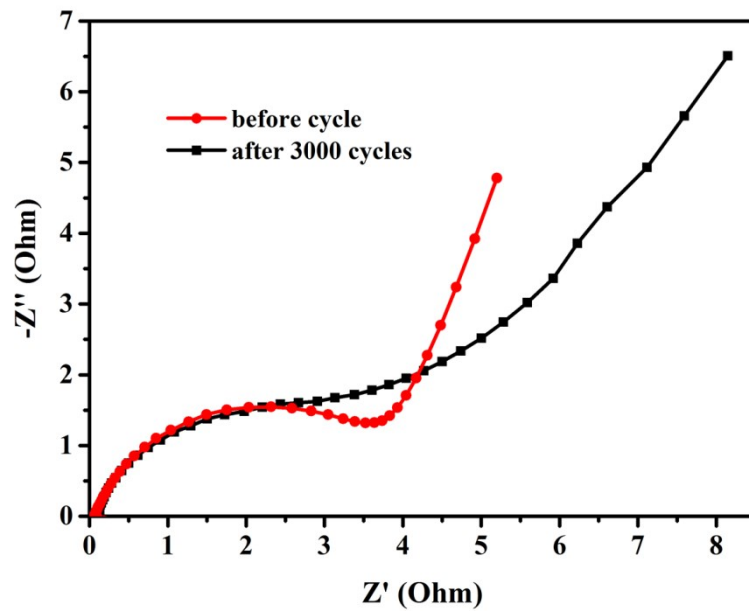

**Figure S8** The Nyquist plots of  $\text{Co}_{11}(\text{HPO}_3)_8(\text{OH})_6$  before and after 3000 cycles.

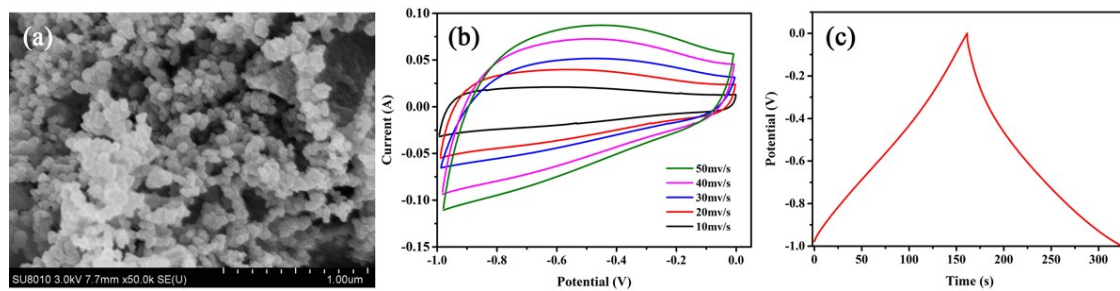

**Figure S9** The microstructure and electrochemical performance of AC. (a) SEM; (b) The CV curves at different scan rates; (c) The GCD curves at the current density of 1 A/g.

Table S1 The comparison of electrochemical performance of metal phosphides electrode materials.

| Electrode                                                                                           | Specific capacitance<br>(at 1 A/g) | Electrolyte    | Rate<br>performance    | Ref.             |
|-----------------------------------------------------------------------------------------------------|------------------------------------|----------------|------------------------|------------------|
| <b>Co<sub>11</sub>(HPO<sub>3</sub>)<sub>8</sub>(OH)<sub>6</sub></b>                                 | <b>919.3 C/g<br/>(1532.2 F/g)</b>  | <b>2 M KOH</b> | <b>71.3 % (20 A/g)</b> | <b>This work</b> |
| Co <sub>11</sub> (HPO <sub>3</sub> ) <sub>8</sub> (OH) <sub>6</sub>                                 | 226 F/g                            | 3 M KOH        | 76 % (7 A/g)           | [1]              |
| Co <sub>11</sub> (HPO <sub>3</sub> ) <sub>8</sub> (OH) <sub>6</sub> -Co <sub>3</sub> O <sub>4</sub> | 1200 F/g (0.5 A/g)                 | 3 M KOH        | 89 % (6 A/g)           | [2]              |
| Ni-Co <sub>3</sub> (PO <sub>4</sub> ) <sub>2</sub>                                                  | 1132.5 F/g                         | 3 M KOH        | 63.3 % (10 A/g)        | [3]              |
| Co <sub>2</sub> Mn(PO <sub>4</sub> ) <sub>2</sub>                                                   | 525 F/g                            | 3 M KOH        | 58 % (8 A/g)           | [4]              |
| Co <sub>3</sub> (PO <sub>4</sub> ) <sub>2</sub>                                                     | 188 F/g (3 A/g)                    | 3 M KOH        | 68 % (9 A/g)           | [5]              |
| Co <sub>3</sub> (PO <sub>4</sub> ) <sub>2</sub> ·8H <sub>2</sub> O                                  | 350 F/g                            | 3 M KOH        | 64.8 % (10 A/g)        | [6]              |
| Co <sub>3</sub> (PO <sub>4</sub> ) <sub>2</sub>                                                     | 410F/g                             | 3 M KOH        | 52.9 % (8 A/g)         | [7]              |
| Co <sub>11</sub> (HPO <sub>3</sub> ) <sub>8</sub> (OH) <sub>6</sub>                                 | 312 F/g (1.25 A/g)                 | -              | 63.4% (12.5 A/g)       | [8]              |
| Mn <sub>3</sub> (PO <sub>4</sub> ) <sub>2</sub> /GF                                                 | 270 F/g (0.5 A/g)                  | 6 M KOH        | -                      | [9]              |
| NaNi <sub>0.33</sub> Co <sub>0.67</sub> PO <sub>4</sub> ·H <sub>2</sub> O                           | 828 F/g                            | 1 M KOH        | 88.7 % (10 A/g)        | [10]             |
| CoHPO <sub>4</sub> ·H <sub>2</sub> O                                                                | 411.2 F/g                          | 2 M KOH        | 82 % (10 A/g)          | [11]             |
| Ni <sub>11</sub> (HPO <sub>3</sub> ) <sub>8</sub> (OH) <sub>6</sub>                                 | 558 F/g (0.5 A/g)                  | 3 M KOH        | 40.1 % (7 A/g)         | [12]             |

Table S2 The  $R_s$ ,  $R_{ct}$ ,  $R_l$  and  $W$  of sample before and after cycles.

| Samples      | $R_s$ ( $\Omega$ ) | $R_{ct}$ ( $\Omega$ ) | $R_l$ ( $\Omega$ ) | $W$   |
|--------------|--------------------|-----------------------|--------------------|-------|
| Before cycle | 0.807              | 3.775                 | 2.252              | 0.334 |
| After cycle  | 0.870              | 3.860                 | 0.133              | 4.777 |

## References

1. D. H. Lee, M. Kang, S.-M. Paek and H. Jung, Bulletin of the Korean Chemical Society, 2016, 37, 192-199.
2. Y. Zhang, M. Zheng, M. Qu, M. Sun and H. Pang, Journal of Alloys and Compounds 2015, 651, 214-221.
3. L. Bing, G. Peng, F. Yongcheng, Z. Guangxun, H. Kesheng, X. Huaiguo and P. Huan, Advanced Functional Materials, 2017, 1605784.
4. H. Mao, Y. Qian, Z. Jin and Y. Zhang, Materials Letters, 2018, 228, 258-261.
5. J. Theerthagiri, K. Thiagarajan, B. Senthilkumar, Z. Khan, R. A. Senthil, P. Arunachalam, J. Madhavan and M. Ashokkumar, ChemistrySelect, 2017, 2, 201-210.
6. H. Li, H. Yu, J. Zhai, L. Sun, H. Yang and S. Xie, Materials Letters, 2015, 152, 25-28.
7. H. Mao, F. Zhang, X. Liu, J. Qiu, B. Li and Z. Jin, Journal of Materials Science: Materials in Electronics, 2018, 29, 16721-16729.
8. H. Pang, Y. Liu, J. Li, Y. Ma, G. Li, Y. Ai, J. Chen, J. Zhang and H. Zheng, Nanoscale, 2013, 5, 503-507.
9. A. A. Mirghni, M. J. Madito, T. M. Masikhwa, K. O. Oyedotun, A. Bello and N. Manyala, J

Colloid Interface Sci, 2017, 494, 325-337.

10. M. Liu, N. Shang, X. Zhang, S. Gao, C. Wang and Z. Wang, *Journal of Alloys and Compounds*, 2019, 791, 929-935.

11. Y. Wang, W. Li, L. Zhang, X. Zhang, B. Tan, J. Hao, Z. Jian, X. Wang, Q. Hu and X. Lu, *Journal of Power Sources*, 2020, 227487.

12. Y. Gao, J. Zhao, Z. Run, G. Zhang and H. Pang, *Dalton Trans*, 2014, 43, 17000-17005.
